# Supplementary material for: Prognostic relevance of the Golgi mannosidase MAN1A1 in ovarian cancer: impact of N-glycosylation on tumour cell aggregation
Source: PubMed Central journal article supplement (PMC6889143; doi:10.1038/s41416-019-0607-2), 2019-10-29
Supplement: 41416_2019_607_MOESM1_ESM.pdf [file 41416_2019_607_MOESM1_ESM.pdf]

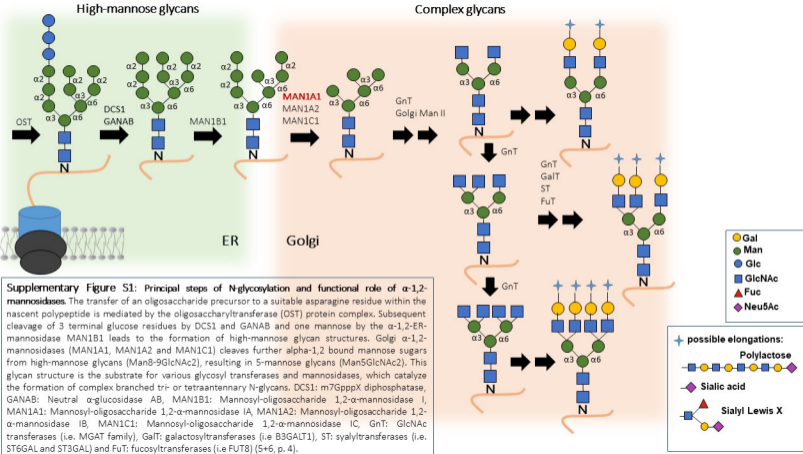

**A**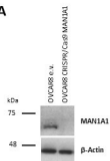**B**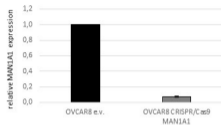**C**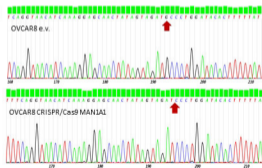

**Supplementary Figure S2:** Western Blot (A) and PCR (B) analysis showing MAN1A1 knock out in the OVCAR8 cell line (CRISPR/Cas9-MAN1A1) compared to empty vector (e.v.,CRISPR/Cas9). C: DNA-sequencing data showing a single base deletion (arrow) in OVCAR8-MAN1A1 k.o. cells.

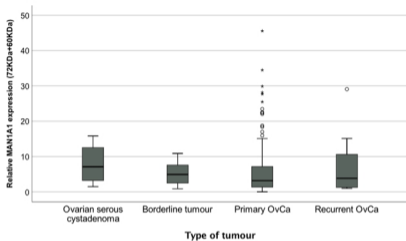

Supplementary Figure S3. Box plot showing MAN1A1 expression (72 kDa + 60 kDa) in different tumour types.

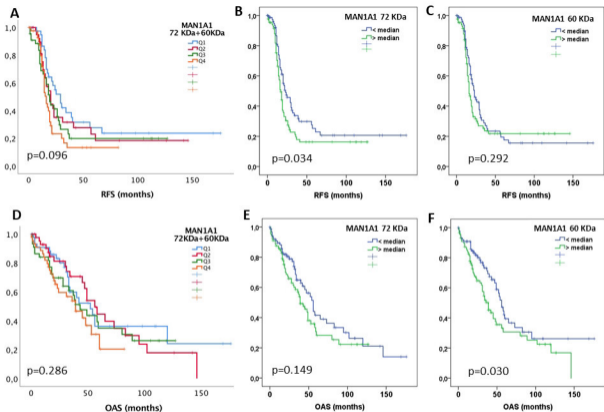

**Supplementary Figure S4:** Kaplan-Meier analysis showing associations of the different MAN1A1 isoforms (60 KDa and 72 KDa) with recurrence-free (A, B and C) and overall survival (D, E and F) in ovarian carcinomas.

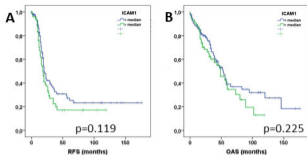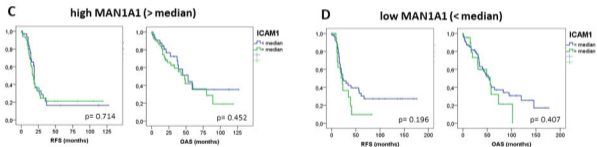

**Supplementary Figure S5.** Kaplan-Meier analysis showing associations of ICAM-1 expression with recurrence-free (A) and overall survival (B) in ovarian carcinomas in the whole cohort and stratified for low (< median, D) or high (> median, C) MAN1A1 mRNA expression.

high MAN1A1 72 KDa (> median)

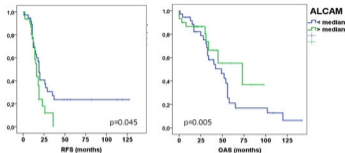

low MAN1A1 72 KDa (< median)

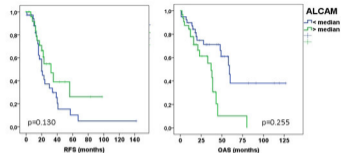

high MAN1A1 60 KDa (> median)

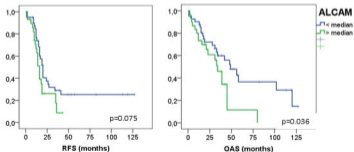

low MAN1A1 60 KDa (< median)

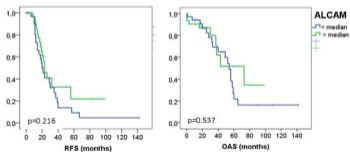

**Supplementary Figure S6:** Kaplan-Meier analysis showing associations of ALCAM expression with recurrence-free and overall survival in ovarian carcinomas, stratified for low (< median) or high (> median) MAN1A1 mRNA expression of both 72 KDa and 60 KDa isoforms.

**Supplementary Table S1:** Correlations of MAN1A1 protein expression with clinical and histological tumor parameters<sup>1</sup>

|                              |                    | MAN1A1 (72kDa) |          |              | MAN1A1 (60kDa) |          |              | MAN1A1 (72kDa+60kDa) |          |              |
|------------------------------|--------------------|----------------|----------|--------------|----------------|----------|--------------|----------------------|----------|--------------|
|                              |                    | < median       | > median | p=           | < median       | > median | p=           | < median             | > median | p=           |
| Clinical stage               | FIGO I-II          | 12             | 2        |              | 8              | 6        |              | 12                   | 2        |              |
|                              | FIGO III           | 64             | 61       |              | 67             | 58       |              | 63                   | 62       |              |
|                              | FIGO IV            | 12             | 25       | <b>0.003</b> | 13             | 24       | 0.122        | 13                   | 24       | <b>0.005</b> |
| Grading                      | G1-2               | 26             | 29       |              | 26             | 29       |              | 28                   | 27       |              |
|                              | G3                 | 60             | 57       | 0.624        | 59             | 58       | 0.700        | 58                   | 59       | 0.870        |
| Lymph node involvement       | N0                 | 26             | 18       |              | 22             | 22       |              | 29                   | 15       |              |
|                              | N1                 | 48             | 53       | 0.200        | 51             | 50       | 0.956        | 42                   | 59       | <b>0.007</b> |
| Distant metastasis           | M0                 | 75             | 63       |              | 74             | 64       |              | 74                   | 64       |              |
|                              | M1                 | 12             | 25       | <b>0.018</b> | 13             | 24       | <b>0.046</b> | 13                   | 24       | <b>0.046</b> |
| Residual tumor after surgery | no macroscopically |                |          |              |                |          |              |                      |          |              |
|                              | visible tumor      | 70             | 52       |              | 67             | 55       |              | 65                   | 57       |              |
|                              | < 1 cm             | 13             | 20       |              | 13             | 20       |              | 16                   | 17       |              |
|                              | > 1 cm             | 5              | 14       | <b>0.015</b> | 8              | 11       | 0.211        | 7                    | 12       | 0.397        |

1, missing values to n=176: no information

## Supplementary Material and Methods

### Antibodies

| Antibody                           | Company, Catalog No.                                                                         | Dilution                                                                                                           | Incubation                     |
|------------------------------------|----------------------------------------------------------------------------------------------|--------------------------------------------------------------------------------------------------------------------|--------------------------------|
| GAPDH                              | Santa Cruz Biotechnology, Heidelberg, Germany, sc-25778                                      | 1:5000 in 1.5 % milk powder in TBS-T                                                                               | 1 hour at room temperature     |
| anti- $\alpha$ -1,2-mannosidase-IA | Abcam, Cambridge, UK, ab140613                                                               | 1:1000 in 1.5 % milk powder in TBS-T                                                                               | Over night at 4°C              |
| ALCAM/CD166                        | Novocastra, Newcastle upon Tyne, UK, NCL-CD166                                               | 1:400 in 1.5 % milk powder in TBS-T                                                                                | Over night at 4°C              |
| ICAM1                              | Santa Cruz Biotechnology, sc-8439                                                            | 1:2000 in 1.5 % milk powder in TBS-T                                                                               | Over night at 4°C              |
| Integrin $\beta$ 4                 | Santa Cruz Biotechnology, sc-55514                                                           | 1:400 in 1.5 % milk powder in TBS-T                                                                                | Over night at 4°C              |
| $\beta$ - Actin                    | Santa Cruz Biotechnology, sc-47778                                                           | 1:2000 in 1.5 % milk powder in TBS-T                                                                               | 1 hour at room temperature     |
| $\alpha$ -Tubulin                  | Cell Signalling Technology, Cambridge, UK, #2125                                             | 1:10000 in 5 % BSA in TBS-T                                                                                        | 1 hour at room temperature     |
| Lamin A/C                          | Cell Signalling Technology, #2032,                                                           | 1:1000 in 1.5 % milk powder in TBS-T                                                                               | Over night at 4°C              |
| ConA                               | Sigma-Aldrich Chemie GmbH, Hamburg, Germany, #C2272, working concentration: 0.025 $\mu$ g/ml | prepared in Hanks solution (Biochrom GmbH, Berlin, Germany) with 1 mM MgCl <sub>2</sub> and 1 mM CaCl <sub>2</sub> | 30 minutes at room temperature |
| PHA-E                              | Vector Laboratories, #B-1125, working concentration: 0.5 $\mu$ g/ml                          |                                                                                                                    | 1 hour at room temperature     |

**TBS-T Buffer:** 20 mM Tris-HCl (pH 7.6), 0.137 M NaCl, 10 % Tween-20

### Primer sequences for CRISPR/Cas9 *MAN1A1* Knock out

sgRNA top: *MAN1A1\_e4\_g1\_FP*: 5'-CACCAGCAACTATAGTAGATGCCC- 3'

sgRNA bottom: *MAN1A1\_e4\_g1\_RP*: 5'-AAACGGGCATCTACTATAGTTGCT- 3'

### Quantitative reverse transcriptase polymerase chain reaction

RNA was isolated with RNeasy Mini Kit (Qiagen, Hilden, Germany) and was reverse transcribed using Maxima First Strand cDNA Synthesis Kit (ThermoFisher Scientific; Pinneberg, Germany). Quantitative reverse transcriptase polymerase chain reaction (qRT-PCR) was performed with SYBR Premix Ex Taq (Takara, Kusatsu, Japan) using the Light Cycler (Roche, Mannheim, Germany). We used the following primer for *MAN1A1*: forward primer, 5'-GAAGGCATGGCCCAACT-3'; reverse primer, 5'-GTAGCGATGGCTTCAACACC-3'. The data were analysed based on the  $\Delta\Delta$ Ct method as described (Oliveira-Ferrer et al, 2014).



### **Genomic DNA isolation and Sanger sequencing**

Isolation of genomic DNA was performed using QIAamp DNA Mini Kit (Qiagen) according to manufacturer's instruction. For amplification of the genomic region targeted by the CRISPR/Cas9, PCR from genomic DNA of control cells (e.v) and MAN1A1 knock out cells and following primers (exon 4) was performed: forward primer, 5'-TATCAGTCGATAGCCCGTGA-3'; reverse primer, 5'-GGGCCACTACAGAATTTATCCA-3'. Sanger sequencing analysis was done by TGCA company.
